# Supplementary material for: Insects as Food: Consumers’ Acceptance and Marketing
Source: MDPI journal article supplement (doi:10.3390/foods12040886), 2023-02-19
Supplement: s1 [file s1]

Table S1: The characteristics of the samples and the main factors of the reviewed articles

| <b>Authors</b>                            | <b>Country</b>           | <b>Sample size: female; mean age (age range)</b>                          | <b>The technique (year)</b>          | <b>Main factors</b>                                                                                                 |
|-------------------------------------------|--------------------------|---------------------------------------------------------------------------|--------------------------------------|---------------------------------------------------------------------------------------------------------------------|
| 1. Alemu et al., (2017)                   | Kenya                    | 611: 51%; 40.02 (18-85)                                                   | Choice experiment (Dec 2014-Jan2015) | Preferences for nutritional value and food safety information, recommendations by officials, shopping places        |
| 2. Ardoïn & Prinyawiwatkul, (2020)        | US                       | 1005: 68.4%; ns (over 18)                                                 | Online survey (ns)                   | Product appropriateness, unfamiliarity with insects as food                                                         |
| 3. Balzan et al., (2016)                  | Italy                    | 32: 65.6%; 24.5 (20-35)                                                   | 5 focus groups (ns)                  | The form in which the products are presented, lack of practice in preparation                                       |
| 4. Barsics et al., (2017)                 | Belgium                  | 135: 23%; 19.4 (17-25)                                                    | Experiment (ns)                      | The information session about entomophagy (encompassing ecological, health, and gastronomic aspects of entomophagy) |
| 5. Bartkiewicz & Babicz-Zielińska, (2020) | Poland                   | 101: 73%; ns (ns)                                                         | Experiment (ns)                      | Visibility of insects, the colour of the ground crickets in the bars                                                |
| 6. Barton et al., (2020)                  | Canada                   | Survey 107: 57%; ns (19-69)<br>Experiment 102: 58.8%; ns (19-69)          | Survey<br>Experiment (ns)            | Tasting session                                                                                                     |
| 7. Berger et al., (2018)                  | Germany                  | Total 240<br>S1 80: 40%; 22.61 (ns)<br>S2 160: 40%; 23.3 (ns)             | Experiments (ns)                     | Price and expected quality                                                                                          |
| 8. Berger et al., (2019)                  | Switzerland and Germany  | S1 120: 50%; ns (ns)<br>S2 90: 45%; 21.39 (ns)                            | Experiments (ns)                     | Peer and expert rating of insect food                                                                               |
| 9. Brunner & Nuttavuthisit, (2019)        | Switzerland and Thailand | Total 1042<br>Switzerland 542: 56%; 54 (ns)<br>Thailand 500: 54%; 44 (ns) | Questionnaire (ns)                   | The level of education and food neophobia                                                                           |
| 10. Caparros Megido et al., (2014)        | Belgium                  | 189: 44.4%; ns (<13 ≥ 45)                                                 | Experiment (ns)                      | The texture, types of meal                                                                                          |

|                                    |                                                                                                           |                                                                                                                |                                                                       |                                                                                                                |
|------------------------------------|-----------------------------------------------------------------------------------------------------------|----------------------------------------------------------------------------------------------------------------|-----------------------------------------------------------------------|----------------------------------------------------------------------------------------------------------------|
| 11. Caparros Megido et al., (2016) | Belgium                                                                                                   | 79: 56%; ns (18-25)                                                                                            | Experiment (2014)                                                     | Gender, previous knowledge of entomophagy and previous experience                                              |
| 12. Castro & Chambers, (2019)      | USA, England, Mexico, India, Japan, China, Russia, Spain, South Africa, Australia, Brazil, Peru, Thailand | Total 7560: ns; ns (18 to more than 55)                                                                        | Online survey (ns)                                                    | The appearance of insects' body parts, the idea is disgusting                                                  |
| 13. Cavallo & Materia, (2018)      | Italy                                                                                                     | 135: 46%; ns (18-35)                                                                                           | Experiment (ns)                                                       | Visibility of the insect shape, high-protein claim                                                             |
| 14. Chang et al., (2019)           | Taiwan                                                                                                    | 316: 41.1%; ns (31-50)                                                                                         | Survey (ns)                                                           | Consumers' attitudes, perceived behavioral control, food neophobia                                             |
| 15. Cicatiello et al., (2016)      | Italy                                                                                                     | 201: 55%; 43 (14-78)                                                                                           | Survey (2015)                                                         | Familiarity with food from a foreign cousin, gender, education                                                 |
| 16. Cicatiello et al., (2020)      | Italy                                                                                                     | 62:47%: 24 (18-35)                                                                                             | Experiment (ns)                                                       | The importance of the taste of food, familiarity with foreign food, gender, education                          |
| 17. Circus & Robison, (2019)       | UK                                                                                                        | Interviews 7: (sociodemographic not collected)<br>Survey: number not reported (sociodemographic not collected) | Interviews and an online survey (ns)                                  | Disgust, environmental friendliness                                                                            |
| 18. Clarkson et al., (2018)        | New Zealand                                                                                               | 32: 71.8%; ns (18-75)                                                                                          | Focus groups (ns)                                                     | Culture, lack of need for an alternative to meat, and lack of knowledge on how to prepare and eat them at home |
| 19. Collins et al., (2019)         | UK                                                                                                        | 161 children: 35%; ns (6-15)<br>114 children's parents: 58%; 45 (33-75)<br>1020: 65%; 21 (12-90)               | Group activity (ns)<br>Questionnaire (ns)<br>Choice experiment (2015) | Visibility of insects                                                                                          |

|                                               |                                                                                              |                                                                                                                                                                                                                                                                                                                                                                                                      |                                               |                                                                                                                 |
|-----------------------------------------------|----------------------------------------------------------------------------------------------|------------------------------------------------------------------------------------------------------------------------------------------------------------------------------------------------------------------------------------------------------------------------------------------------------------------------------------------------------------------------------------------------------|-----------------------------------------------|-----------------------------------------------------------------------------------------------------------------|
| 20. de Koning et al., (2020)                  | China, US, France<br>UK, New Zealand, The Netherlands, Brazil, Spain, The Dominican Republic | Total: 3091: 59.3%; 34.1 (16-83)<br>China 571: 60.8%; 31.2 (19-72)<br>US 539: 75.4%; 44.1 (18-71)<br>France 484: 31.8%; 29 (18-68)<br>UK 366: 76.2%; 32 (19-67)<br>New Zealand 268: 53.2; 37.9 (18-70)<br>The Netherlands 231: 62.3%; 29.6 (17-70)<br>Brazil 216: 56.9%; 38.2 (17-77)<br>Spain 210: 48.1%; 35.1 (19-83)<br>The Dominican Republic 206: 66%; 26.2 (16-96)<br>718: 57.5%; 13.67 (9-19) | Survey digital and hard copy (2018-2019)      | Food neophobia                                                                                                  |
| 21. Dupont & Fiebelkorn, (2020)               | Germany                                                                                      |                                                                                                                                                                                                                                                                                                                                                                                                      | Questionnaire in a paper-pencil format (2018) | Age, food neophobia, attitudes                                                                                  |
| 22. Fischer & Steenbekkers, (2018)            | The Netherlands                                                                              | 140: 54%; 24.9 (ns)                                                                                                                                                                                                                                                                                                                                                                                  | Online survey (2014)                          | The most marketed insects, affective attitude component and disgust                                             |
| 23. Gere et al., (2017)                       | Hungary                                                                                      | 400: 65%; 25.5 (ns)                                                                                                                                                                                                                                                                                                                                                                                  | Online survey (2016)                          | Food neophobia, seek new food choice options, intention to reduce their intake of fresh meat in the coming year |
| 24. Gómez-Luciano, Vriesekoop, et al., (2019) | Dominican Republic and Spain                                                                 | Total 401<br>Dominican Republic 201: 31.5%; 25 (16-70)<br>Spain 200: 47%; 35.5 (16-83)                                                                                                                                                                                                                                                                                                               | Online and face to face survey (2017)         | Disgust                                                                                                         |
| 25. Gómez-Luciano, de Aguiar, et al., (2019)  | UK, Spain, Brazil<br>Dominican Republic                                                      | Total 729:<br>UK 180: 51.7 %; ns (>24 ≥ 65)<br>Spain 200: 47%; ns (>24 ≥ 65)<br>Brazil 216: 56.9%; ns (>24 ≥ 65)<br>The Dominican Republic 133: 50.4%; ns (>24 ≥ 65)                                                                                                                                                                                                                                 | Survey (2017)                                 | Disgust                                                                                                         |

|                                 |                   |                                                                                                  |                                                                           |                                                                                                |
|---------------------------------|-------------------|--------------------------------------------------------------------------------------------------|---------------------------------------------------------------------------|------------------------------------------------------------------------------------------------|
| 26. Hartmann & Siegrist, (2016) | Switzerland       | Total 104<br>Control group 53: 41.5%; 32.3 (18-65)<br>Experimental group 51: 45.1%; 35.4 (18-65) | Experiment (2015)                                                         | Exposure to processed insect products                                                          |
| 27. Hartmann et al., (2015)     | Germany and China | Germany 502: 52%; 44.3 (20-69)<br>China 443: 51%; 44.2 (20-69)                                   | Survey (2014)                                                             | Food neophobia, taste expectations, social acceptance, and past experience with eating insects |
| 28. House, (2016)               | The Netherlands   | 33: ns; ns (ns)                                                                                  | semi-structured interviews (2015)                                         | Taste, availability, degree of fit with current eating patterns                                |
| 29. Iannuzzi et al., (2019)     | Italy             | 587: ns; ns (18-56)                                                                              | Online survey (ns)                                                        | Disclosed product ingredients                                                                  |
| 30. Jensen & Lieberoth, (2019)  | Denmark           | 189: 84%; 21.7 (ns)                                                                              | Online survey, sensory test (ns)                                          | Perceived social norms                                                                         |
| 31. Kornher et al., (2019)      | Germany           | 311: 73.2%; 30.85 (ns)                                                                           | Choice experiment (2016)                                                  | Disgust, Food neophobia. interest in consuming climate-friendly products                       |
| 32. La Barbera et al., (2018)   | Italy             | 118: 49%; 23.95 (ns)                                                                             | Experiment (ns)                                                           | Food Neophobia and disgust                                                                     |
| 33. La Barbera et al., (2020)   | Denmark and Italy | <b>S1</b> Denmark 975: 51%; ns (18-75)<br><br><b>S2</b> Italy: 543: 60%; 28 (ns)                 | Focus groups (32), then online questionnaire (2017)<br>Online survey (ns) | Disgust, individuals' interest to try novel experiences and eating novel foods                 |
| 34. Lammers et al., (2019)      | Germany           | 516: 51.6%; 47 (18-87)                                                                           | Online survey (2018)                                                      | Disgust, previous insect consumption and food neophobia                                        |
| 35. Laureati et al., (2016)     | Italy             | Survey 314: 65.4%; 31.9 (18-80)<br>Experiment (68 of the above): 61.8%; 21.4 (ns)                | Online survey, experiment (ns)                                            | Food neophobia, age, gender, cultural background                                               |

|                                         |                               |                                                                                                               |                                                                                            |                                                                                                                                  |
|-----------------------------------------|-------------------------------|---------------------------------------------------------------------------------------------------------------|--------------------------------------------------------------------------------------------|----------------------------------------------------------------------------------------------------------------------------------|
| 36. Le Goff & Delarue, (2017)           | France                        | 100: 67%; ns (18-64)                                                                                          | Nonverbal evaluation (videotape before and after taste evaluation) (ns)                    | Tasting                                                                                                                          |
| 37. Lensvelt & Steenbekkers, (2014)     | The Netherlands and Australia | <b>S1</b> 209: 134 Netherlands & 75 Australia; ns; ns (ns)<br><b>S2</b> 133: Australians 63.3%; ns (<10 > 80) | Online survey Experiment (ns)                                                              | Previous experience, price, quality, perceived product benefits and risk, convenience, trust                                     |
| 38. Liu, Ai-Jun; Li, Jie; Gómez, (2020) | China                         | 614: ns; ns (18 - more than 65)                                                                               | Survey (2012)                                                                              | Disgust, insect phobia, safety concerns, age, income, region, household size                                                     |
| 39. Lombardi et al., (2019)             | Italy                         | 200: 40%; 20.5; (ns)                                                                                          | Experiment (2017)                                                                          | Different carriers, disclose information concerning the benefits, food neophobia, beliefs and attitudes about insects            |
| 40. Mancini, Sogari, et al., (2019)     | Italy                         | 165: 83.3%; ns (ns)                                                                                           | Experiment (2018)                                                                          | Food neophobia, the intention to eat products containing insect powder in the coming months                                      |
| 41. Menozzi et al., (2017)              | Italy                         | 231: 61.9%; 23.6 (young adults)                                                                               | Online survey (ns)                                                                         | Attitude, perceived behavioral control, beliefs regarding health and the environment, disgust arising from seeing insects around |
| 42. Modlinska et al., (2020)            | Poland                        | 99: 81.8%; 22 (18-45)                                                                                         | Experiment: Trying food containing insects and semi-structured individual interview (2019) | Labelling, general neophobia, and variety-seeking tendency in food consumption                                                   |
| 43. Motoki et al., (2020)               | Japan                         | <b>S1</b> 96: 32.3%; 41.1 (ns)<br><b>S2</b> 104: 30.7%; 42.9 (ns)<br><b>S3</b> 104: 49%; 39.9 (ns)            | Online survey (2020)                                                                       | Social companions (friends), location (pubs and food festivals)                                                                  |

|                                   |                   |                                                                                                        |                                                            |                                                                                                                                                                       |
|-----------------------------------|-------------------|--------------------------------------------------------------------------------------------------------|------------------------------------------------------------|-----------------------------------------------------------------------------------------------------------------------------------------------------------------------|
| 44. Myers & Pettigrew, (2018)     | Western Australia | 77: 87%; 73 (60-100)                                                                                   | Interviews (April 2015-February 2016)                      | Perceived cultural norms, lack of necessity for eating insect food, and concerns about the natural balance                                                            |
| 45. Nyberg et al., (2020)         | Sweden            | Questionnaire 82: 64.6%; ns (more than 18)<br>Workshop 15: 40%; ns (ns)                                | Questionnaire (2018)<br>Workshop discussion (2019)         | Concerns about the environment and health, willingness to try something "exciting"                                                                                    |
| 46. Olum et al., (2020)           | Uganda            | 310: ns; ns (ns)                                                                                       | Face-to-face interview using structured questionnaire (ns) | Culture, familiarity with edible insects, age, education, food neophobia                                                                                              |
| 47. Onwezen et al., (2019)        | The Netherlands   | <b>S1</b> 2461: 41.1%; 46 (ns)<br><b>S2</b> 2771: 50.2%; 45.9 (ns)<br><b>S3</b> 1001: 48.9%; 49.6 (ns) | Experiment (ns)                                            | Weak personal norms regarding personal health and being environmental-friendly, affective communication                                                               |
| 48. Orkusz et al., (2020)         | Poland            | Total: 866<br>Survey 464: 64.8%; ns (18-24)<br>Sensory test 402: ns; ns (18-78)                        | Survey<br>Sensory test (2019)                              | Food neophobia                                                                                                                                                        |
| 49. Orsi et al., (2019)           | Germany           | 393: 51%; 36 (13-82)                                                                                   | Online survey (Dec 2018-Jan 2019)                          | Visibility of the insects. Food neophobia and disgust                                                                                                                 |
| 50. Palmieri et al., (2019)       | Italy             | 456: 67.9%; 41 (18-65)                                                                                 | Web-based survey (2018)                                    | Taste expectations, concerns about the health and environmental impact of insect food, previous experiences with edible insects, neophilia, food technology neophobia |
| 51. Pambo et al., (2017)          | Kenya             | 54: 53.7%; 45 (ns)                                                                                     | Laddering interviews (ns)                                  | Providing information, tasting cricket buns                                                                                                                           |
| 52. Pambo, Okello, et al., (2018) | Kenya             | 432: 55.6%; 28.1 (ns)                                                                                  | Survey (ns)                                                | Trust in government and industry, perceived availability of insect-based foods, household size, level of formal education                                             |

|                                     |                                                                                 |                                                                                               |                                          |                                                                                                                                                       |
|-------------------------------------|---------------------------------------------------------------------------------|-----------------------------------------------------------------------------------------------|------------------------------------------|-------------------------------------------------------------------------------------------------------------------------------------------------------|
| 53. Pascucci & De-Magistris, (2013) | The Netherlands                                                                 | 122: 51% (18 - over 64)                                                                       | Choice Experiment (2011/2012)            | Visibility, logo showing insects, nutritional claims, information about the health and environmental benefits                                         |
| 54. Payne, (2015)                   | Japan                                                                           | Survey 220: 42%; ns (ns)<br>Interviews number not reported: ns; ns (ns)                       | Sequential mixed methods approach (2013) | Age, availability of the species                                                                                                                      |
| 55. Petersen et al., (2020)         | US                                                                              | Survey 98: 51%; 20 (18-24)<br>Tasting test 61: ns; ns (ns)                                    | Experiment (ns)                          | Environmental and nutritional benefits associated with insect food products                                                                           |
| 56. Piha et al., (2018)             | (Northern and Central Europe- Finland, Sweden, Germany, and the Czech Republic) | Total 887:<br>Northern Europe 430: 60%; 37.5 (17-96)<br>Central Europe 457: 61%; 39.7 (17-96) | Online survey (2016)                     | Consumer knowledge (subjective and objective). Product-related experiences, food neophobia. general attitudes                                         |
| 57. Poortvliet et al., (2019)       | The Netherlands                                                                 | 130: 68%; ns; (18-65)                                                                         | Experiment (ns)                          | Use of insects in common product type                                                                                                                 |
| 58. Powell et al., (2019)           | UK                                                                              | 510: 50%; 34.33 (18-70)                                                                       | Experiment (ns)                          | Disgust propensity, perceive taste and naturalness                                                                                                    |
| 59. Roma et al., (2020)             | Italy                                                                           | 310: 61.1%; 33 (18-81)                                                                        | Online survey (2019)                     | Age                                                                                                                                                   |
| 60. Ruby & Rozin, (2019)            | US                                                                              | 275: 55%; 35.9 (ns)                                                                           | Questionnaire (ns)                       | Disgust, Religion, sushi consumption, benefits                                                                                                        |
| 61. Rumpold & Langen, (2019)        | India<br>Germany                                                                | 201: 34%; 32 (ns)<br>149: 55%; 31.9 (10-69)                                                   | Survey<br>Sensory test (2017)            | Providing participants with information about edible insects                                                                                          |
| 62. Schösler et al., (2012)         | The Netherlands                                                                 | 1083: 50%; 49.5 (18- 92)                                                                      | Online survey (2010)                     | Visibility of insects                                                                                                                                 |
| 63. Schäufele et al., (2019)        | Germany                                                                         | 342: ns; ns (under 18-over 65)                                                                | Survey (ns)                              | Species, low social and cultural acceptance, visibility of insects                                                                                    |
| 64. Schlup & Brunner, (2018)        | Switzerland                                                                     | 379: 54%; 53 (ns)                                                                             | survey (2015)                            | Convenience orientation, discernibility of insects in food, perceived health benefits of meat, food technology neophobia, prior consumption, need for |

|                                  |                              |                                                                                     |                                        |                                                                                                                                      |
|----------------------------------|------------------------------|-------------------------------------------------------------------------------------|----------------------------------------|--------------------------------------------------------------------------------------------------------------------------------------|
| 65. Séré et al., (2018)          | Burkina Faso                 | 360: 48%; ns (15 and 65)                                                            | Semi-structured interviews (2015-2016) | familiarity, food neophobia, expected food healthiness of insects, gender<br>Availability of the species and its host, ethnic groups |
| 66. Simion et al., (2019)        | Romania                      | 122: 44%; ns (over 20)                                                              | Online survey (ns)                     | Visibility                                                                                                                           |
| 67. Sogari et al., (2017)        | Italy                        | 109: 53%; ns (18-25)                                                                | Experiment (2015)                      | Curiosity about the taste and texture, disgust at insects, social influence by family members and/or friends                         |
| 68. Sogari et al., (2018)        | Italy                        | 88: 51%; ns (ns)                                                                    | Experiment (ns)                        | Tasting the insect-based products                                                                                                    |
| 69. Sogari et al., (2019)        | Italy                        | 88: 51%; 25.7 (18-40)                                                               | Experiment (2016)                      | Gender, food neophobia, intention to try                                                                                             |
| 70. Sogari, (2015)               | Italy                        | 46: ns; ns (ns)                                                                     | Experiment (2015)                      | Curiosity, the environmental benefits, family members' and friends' opinions                                                         |
| 71. Sogari, et al., (2019)       | Australia                    | 555: 49.7%; ns (18-40)                                                              | Open-ended questions (2018 and 2019)   | Neophobia and disgust, perception of threats to masculinity                                                                          |
| 72. Szendrő et al., (2020)       | Hungary                      | 414: 65.5%; ns (18->50)                                                             | Online survey (2020)                   | Gender, disgust regarding food made from insects, education                                                                          |
| 73. Tan et al., (2015)           | The Netherlands and Thailand | Total 54: 64.8%; 38 (20-65)<br>Dutch 29: 62%; ns (ns)<br>Thailand: 25; 59%; ns (ns) | 8 Focus groups (ns)                    | Cultural exposure, individual eating experience                                                                                      |
| 74. Tan et al., (2016)           | The Netherlands              | 103: 39.8%;22.9 (ns)                                                                | Experiment (ns)                        | Perceived food appropriateness                                                                                                       |
| 75. Tan, Tibboel, et al., (2017) | The Netherlands              | 100: 34%; 23.3 (ns)                                                                 | Experiment (ns)                        | Perceived food appropriateness                                                                                                       |
| 76. Tan, Verbaan, et al., (2017) | The Netherlands              | Total 214<br>135 willing tasters: 80%;33 (18-65)                                    | Experiment (ns)                        | Perceive food preparation appropriateness, satisfied with the taste experience                                                       |



|                                |                   |                                                                                                                                |                                     |                                                                                                       |
|--------------------------------|-------------------|--------------------------------------------------------------------------------------------------------------------------------|-------------------------------------|-------------------------------------------------------------------------------------------------------|
| 77. Tuccillo et al., (2020)    | Italy             | 79 unwilling tasters: 65.8%; 50.9 (18-65)<br>The survey 400: 53.7%; 39 (18-75)<br>The sensory evaluation 58: 36%; 38.3 (19-67) | Survey<br>Sensory evaluation (2020) | Gender, food neophobia, disgust, visibility                                                           |
| 78. Van Thielen et al., (2019) | Belgium           | 388: 50%; 43.5; (18-69)                                                                                                        | Telephone survey (2016)             | Packaging, place, promotion                                                                           |
| 79. Vanhonacker et al., (2013) | Belgium           | 221: 64.3%; 41.3 (18->60)                                                                                                      | Online survey (2011)                | NA (there were other substitutes in the survey and all respondents were negative toward insects)      |
| 80. Verbeke, (2015)            | Belgium           | 368: 61%; 42 (18-79)                                                                                                           | Online survey (2013)                | Food neophobia, convenience orientation, the importance of the environmental impact of food choices   |
| 81. Verneau et al., (2016)     | Denmark and Italy | Total 264<br>Denmark 136: 44.8%; 23.33 (ns)<br>Italy 128: 55.4%; 23.94 (ns)                                                    | Experiment (ns)                     | Communicating with consumers with different messages (about the benefits for society and individuals) |
| 82. Verneau et al., (2020)     | Italy and Denmark | 280: 49%; 23.61 (ns)                                                                                                           | computer-based questionnaires (ns)  | Perceived behavioral control, gender, education                                                       |
| 83. Videbæk & Grunert, (2020)  | Denmark           | 975: 50.9%; ns (18-75)                                                                                                         | Choice experiment (2017)            | Interest in edible insects as food. Disgust, age, gender                                              |
| 84. Wilkinson et al., (2018)   | Australia         | 820: 45%; ns (18-65)                                                                                                           | Online survey (ns)                  | Taste/flavor, the appearance of insects, safety, quality                                              |
| 85. Woolf et al., (2019)       | USA               | 397: 65.7%; ns; (18-94)                                                                                                        | Online survey (2017)                | Familiar with the concept (heard, seen, learned), knowledgeable about the benefits                    |

ns: not specified.

Table S2: Details of the products reviewed

| <b>Authors</b>                           | <b>Country</b>                                                                        | <b>Products Details</b>                                                                                                                                                               | <b>Visible/invisible</b> | <b>Insect type</b>                               |
|------------------------------------------|---------------------------------------------------------------------------------------|---------------------------------------------------------------------------------------------------------------------------------------------------------------------------------------|--------------------------|--------------------------------------------------|
| 1. Alemu et al., (2017)                  | Kenya                                                                                 | Termite powder, whole termites fried and salted.                                                                                                                                      | Visible and invisible    | Termites                                         |
| 2. Ardoin & Prinyawiwatkul, (2020)       | US                                                                                    | Both were presented with Ugali (stiff porridge)<br>A list of 30 products includes protein, energy bars, chips, snack crackers, protein shakes, bakery, cereal products, snacks, candy | Visible and invisible    | NS                                               |
| 3. Balzan et al., (2016)                 | Italy                                                                                 | Cheddar cheese larvets, lollipops, chocolate-covered scorpion, worm salt, dried crickets, baked grasshoppers, toasted scorpions                                                       | Visible and invisible    | Larvae, Scorpions, worms, crickets, grasshoppers |
| 4. Barsics et al., (2017)                | Belgium                                                                               | Bread faux-labelled as containing 10% mealworm flour                                                                                                                                  | Invisible                | Mealworms                                        |
| 5. Bartkowicz & Babicz-Zielińska, (2020) | Poland                                                                                | insect bar with whole mealworms, another with ground mealworms, and a bar with crushed crickets                                                                                       | Visible and invisible    | Mealworms, house crickets                        |
| 6. Barton et al., (2020)                 | Canada                                                                                | Drink contains cricket-based protein powder                                                                                                                                           | Invisible                | Crickets                                         |
| 7. Berger et al., (2018)                 | Germany                                                                               | Mealworm burger and mealworms with truffles                                                                                                                                           | Visible and invisible    | Mealworms                                        |
| 8. Berger et al., (2019)                 | S1 Switzerland<br>S2 Germany                                                          | <b>S1</b> mealworm nutrition bar<br><b>S2</b> mealworm nutrition bar and mealworm burgers                                                                                             | Invisible                | Mealworms                                        |
| 9. Brunner & Nuttavuthisit, (2019)       | Switzerland<br>Thailand                                                               | Insect burger, crunchy larvae and chips made with cricket flour, muesli with insects for breakfast and sweet insect mousse as a dessert                                               | Visible and invisible.   | Larvae, crickets                                 |
| 10. Caparros Megido et al., (2014)       | Belgium                                                                               | Edible insects (baked/boiled/flavoured or dunked in chocolate)                                                                                                                        | NS                       | Mealworms, house crickets                        |
| 11. Caparros Megido et al., (2016)       | Belgium                                                                               | 4 burgers: beef, lentils, mealworms and beef, mealworms and lentils                                                                                                                   | Invisible                | Mealworms                                        |
| 12. Castro & Chambers, (2019)            | 13 countries: USA, England, Mexico, India, Japan, China, Russia, Spain, South Africa, | Foods containing insect powder as an ingredient                                                                                                                                       | Invisible                | NS                                               |

|                                    |                                                                                                          |                                                                                                                                                                                                                    |                        |                                                                |
|------------------------------------|----------------------------------------------------------------------------------------------------------|--------------------------------------------------------------------------------------------------------------------------------------------------------------------------------------------------------------------|------------------------|----------------------------------------------------------------|
|                                    | Australia, Brazil,<br>Peru, Thailand                                                                     |                                                                                                                                                                                                                    |                        |                                                                |
| 13. Cavallo & Materia,<br>(2018)   | Italy                                                                                                    | Snacks with the shape of an insect, and snacks made with insect flour                                                                                                                                              | Visible and invisible  | NS                                                             |
| 14. Chang et al., (2019)           | Taiwan                                                                                                   | Cricket biscuits, cricket bread, fried insects (e.g., grasshoppers, pupae, mealworms)                                                                                                                              | Visible and invisible  | Crickets, grasshoppers,<br>pupae, mealworms                    |
| 15. Cicatiello et al.,<br>(2016)   | Italy                                                                                                    | Preparation comparable to sushi, street food stands with different types of fried insects, skewers with pupae, plate with larvae and pupae with some vegetables, meat burger with some larvae on the top           | Visible.               | Pupae, larvae                                                  |
| 16. Cicatiello et al.,<br>(2020)   | Italy                                                                                                    | Chocolate bar with insect flour, whole crickets, tortilla chips containing insect flour, and dried whole mealworms with caramel                                                                                    | Visible and invisible. | Crickets, mealworms                                            |
| 17. Circus & Robison,<br>(2019)    | UK                                                                                                       | Edible insects                                                                                                                                                                                                     | NS                     | NS                                                             |
| 18. Clarkson et al.,<br>(2018)     | New Zealand                                                                                              | Variety of products developed by participants (i.e., sweet snack, drink, or breakfast options)                                                                                                                     | Visible and invisible  | Locusts, crickets                                              |
| 19. Collins et al., (2019)         | UK                                                                                                       | Variety of insect-based products: e.g., Insect bar, cookies with cricket powder, bug salad, fried rice with larvae and Insect quiche, mealworm protein with rice, insect burger, mealworm mince, grasshopper mince | Visible and invisible  | Mealworms, locusts,<br>crickets, larvae, bugs,<br>grasshoppers |
| 20. de Koning et al.,<br>(2020)    | China, US, France<br>UK, New Zealand,<br>The Netherlands,<br>Brazil, Spain, The<br>Dominican<br>Republic | Insect-based protein                                                                                                                                                                                               | NS                     | NS                                                             |
| 21. Dupont &<br>Fiebelkorn, (2020) | Germany                                                                                                  | Insects as food, insect-based burger                                                                                                                                                                               | NS                     | NS                                                             |

|                                               |                                                           |                                                                                                                                                                                                                         |                       |                                                                                                                                                                                 |
|-----------------------------------------------|-----------------------------------------------------------|-------------------------------------------------------------------------------------------------------------------------------------------------------------------------------------------------------------------------|-----------------------|---------------------------------------------------------------------------------------------------------------------------------------------------------------------------------|
| 22. Fischer & Steenbekkers, (2018)            | The Netherlands                                           | 17 species of insects                                                                                                                                                                                                   | NS                    | Grasshoppers, mealworms, butterflies, dragonflies, caterpillars, crickets, beetles, moths, bees, termites, worms, water bugs, cockroaches, ants, wasps, insect eggs, slantface. |
| 23. Gere et al., (2017)                       | Hungary                                                   | Insects as a substitute for meat                                                                                                                                                                                        | NS                    | NS                                                                                                                                                                              |
| 24. Gómez-Luciano, Vriesekoop, et al., (2019) | Dominican Republic and Spain                              | Insect proteins                                                                                                                                                                                                         | NS                    | NS                                                                                                                                                                              |
| 25. Gómez-Luciano, de Aguiar, et al., (2019)  | The United Kingdom<br>Spain, Brazil<br>Dominican Republic | Insect-based proteins                                                                                                                                                                                                   | NS                    | NS                                                                                                                                                                              |
| 26. Hartmann & Siegrist, (2016)               | Switzerland                                               | Control group: Insects, deep-fried silkworms, deep-fried crickets<br>Experimental group: Tortilla chips (corn meal vs. cricket flour)                                                                                   | Visible and invisible | Silkworms, crickets                                                                                                                                                             |
| 27. Hartmann et al., (2015)                   | Germany and China                                         | Different food contexts (insects as a meat substitute, deep-fried silkworms, deep-fried crickets, drinks containing silkworm protein, cookies based on cricket flour and chocolate chip cookies based on cricket flour) | Visible and invisible | Silkworms, crickets                                                                                                                                                             |
| 28. House, (2016)                             | The Netherlands                                           | Burgers, nuggets, schnitzel and pittige punten, all of which are made with vegetables and 13-15% ground-up buffalo worms, the larvae of the beetle                                                                      | Invisible             | Buffalo worms, larvae of the beetle                                                                                                                                             |
| 29. Iannuzzi et al., (2019)                   | Italy                                                     | Pizza with cricket flour and pizza with cricket flour and spirulina                                                                                                                                                     | Invisible             | Cricket                                                                                                                                                                         |

|                                         |                               |                                                                                                                                                                                                                                     |                        |                                   |
|-----------------------------------------|-------------------------------|-------------------------------------------------------------------------------------------------------------------------------------------------------------------------------------------------------------------------------------|------------------------|-----------------------------------|
| 30. Jensen & Lieberoth, (2019)          | Denmark                       | Roasted mealworms, spring rolls sprinkled with visible roasted mealworms, spring rolls with mealworm flour, buttermilk soup sprinkled with roasted mealworms, buttermilk soup with processed mealworms                              | Visible and invisible. | Mealworms.                        |
| 31. Kornher et al., (2019)              | Germany                       | Beef burger patty fortified with insect flour                                                                                                                                                                                       | Invisible              | NS                                |
| 32. La Barbera et al., (2018)           | Italy                         | Chocolate bar with peanuts enriched with protein from crickets                                                                                                                                                                      | Invisible              | Cricket                           |
| 33. La Barbera et al., (2020)           | Denmark and Italy             | <b>S1</b> Mealworms, grasshoppers, ants<br><b>S2</b> Insect products                                                                                                                                                                | NS                     | Mealworms, grasshoppers, and ants |
| 34. Lammers et al., (2019)              | Germany                       | Buffalo worms, buffalo worm burger                                                                                                                                                                                                  | Visible and invisible  | Buffalo worms                     |
| 35. Laureati et al., (2016)             | Italy                         | Biscuits made using insect flour, chocolate-coated grasshoppers, cereal bars containing insects, apple salad containing insects, tequila containing a larva, risotto containing maggots, maggot cheese, lollipops containing larvae | Visible and invisible  | Grasshopper, larva, maggot        |
| 36. Le Goff & Delarue, (2017)           | France                        | Potato chips claimed to be insect-based with 4 different flavours: strawberry, blackcurrant, chicken, barbecue                                                                                                                      | Invisible              | NS                                |
| 37. Lensvelt & Steenbekkers, (2014)     | The Netherlands and Australia | Roasted crickets and a savory biscuit made with insect flour which contained a combination of ground crickets, mealworms, and pupae                                                                                                 | Visible and invisible. | Crickets, mealworms, and pupae    |
| 38. Liu, Ai-Jun; Li, Jie; Gómez, (2020) | China                         | Edible insects                                                                                                                                                                                                                      | NS                     | NS                                |
| 39. Lombardi et al., (2019)             | Italy                         | Pasta, cookies, chocolate bars with non-visible mealworms and their conventional counterparts                                                                                                                                       | Invisible              | Mealworms                         |
| 40. Mancini, Sogari, et al., (2019)     | Italy                         | Bread with insect powder                                                                                                                                                                                                            | Invisible              | NS                                |

|                               |                   |                                                                                                                                                                                                                             |                                                                             |                                                                               |
|-------------------------------|-------------------|-----------------------------------------------------------------------------------------------------------------------------------------------------------------------------------------------------------------------------|-----------------------------------------------------------------------------|-------------------------------------------------------------------------------|
| 41. Menozzi et al., (2017)    | Italy             | Chocolate chip cookie (containing 10% cricket flour)                                                                                                                                                                        | Invisible                                                                   | Cricket                                                                       |
| 42. Modlinska et al., (2020)  | Poland            | Cricket flour cookies, mealworm flour cupcakes, beetle flour date balls, cookies with crickets, cupcakes with particles of mealworm larvae, date balls with May beetle particles                                            | Visible and invisible                                                       | Mealworms, cricket, beetle                                                    |
| 43. Motoki et al., (2020)     | Japan             | <b>S1</b> Insect-based food<br><b>S2</b> Insect-based food<br><b>S3</b> Insect-based foods (mealworm burger, cricket chocolate bar)                                                                                         | Invisible                                                                   | Mealworm, cricket                                                             |
| 44. Myers & Pettigrew, (2018) | Western Australia | Entomophagy                                                                                                                                                                                                                 | NS                                                                          | NS                                                                            |
| 45. Nyberg et al., (2020)     | Sweden            | Dried mealworms and crickets, bread with added cricket flour                                                                                                                                                                | Visible and invisible                                                       | Mealworms, crickets                                                           |
| 46. Olum et al., (2020)       | Uganda            | Long-horned grasshoppers, flying African termites and the wingless red termites                                                                                                                                             | Visible                                                                     | Long-horned grasshoppers, flying African termites, and wingless red termites. |
| 47. Onwezen et al., (2019)    | The Netherlands   | <b>S1</b> Grasshoppers, mealworms and beetles<br><b>S2</b> Fresh insects, dried insects, fried insects, processed insects<br><b>S3</b> Insect-based burger made from buffalo worms                                          | <b>S1</b> Visible<br><b>S2</b> Visible and invisible<br><b>S3</b> Invisible | Grasshoppers, mealworms and beetles, buffalo worms                            |
| 48. Orkusz et al., (2020)     | Poland            | Whole insects, bread with a 20% addition of powder from crickets                                                                                                                                                            | Visible and invisible                                                       | Crickets                                                                      |
| 49. Orsi et al., (2019)       | Germany           | Snack of buffalo worms, locusts, mealworms; granola mixed with buffalo worms; protein bar made with cricket powder; pasta made with buffalo worms; burger made with buffalo worms mixed with egg, soy and other ingredients | Visible and invisible                                                       | Buffalo worms, locusts, mealworms, crickets                                   |
| 50. Palmieri et al., (2019)   | Italy             | Insect-based food                                                                                                                                                                                                           | NS                                                                          | NS                                                                            |
| 51. Pambo et al., (2017)      | Kenya             | Cricket buns                                                                                                                                                                                                                | Invisible                                                                   | Cricket                                                                       |

|                                     |                                                                                 |                                                                                                                                                                                                                                                                                               |                        |                                   |
|-------------------------------------|---------------------------------------------------------------------------------|-----------------------------------------------------------------------------------------------------------------------------------------------------------------------------------------------------------------------------------------------------------------------------------------------|------------------------|-----------------------------------|
| 52. Pambo, Okello, et al., (2018)   | Kenya                                                                           | Cricket-flour buns                                                                                                                                                                                                                                                                            | Invisible              | Crickets                          |
| 53. Pascucci & De-Magistris, (2013) | The Netherlands                                                                 | Insect-based product that looks like sushi                                                                                                                                                                                                                                                    | Visible and invisible. | NS                                |
| 54. Payne, (2015)                   | Japan                                                                           | Edible insects                                                                                                                                                                                                                                                                                | NS                     | Wasp larvae, grasshopper          |
| 55. Petersen et al., (2020)         | US                                                                              | Chocolate brownie made with cricket powder                                                                                                                                                                                                                                                    | Invisible              | Crickets                          |
| 56. Piha et al., (2018)             | (Northern and Central Europe- Finland, Sweden, Germany, and the Czech Republic) | Crunchy crickets for a snack with dipping sauce, a mix of ground ants and blueberries, cricket-rye snacks, giant mealworm wok, chicken-mealworm nuggets, crushed mealworms with chili                                                                                                         | Visible and invisible  | Cricket, ground ants, mealworms   |
| 57. Poortvliet et al., (2019)       | The Netherlands                                                                 | Insect burgers made from buffalo worms, mealworms, locusts; skewers insect cubes from buffalo worms, locusts                                                                                                                                                                                  | Invisible              | Buffalo worms, mealworms, locusts |
| 58. Powell et al., (2019)           | UK                                                                              | Insect-based burgers                                                                                                                                                                                                                                                                          | Invisible              | NS                                |
| 59. Roma et al., (2020)             | Italy                                                                           | Cricket flour, cookies made from wheat and insect flour, cookies containing visible insects                                                                                                                                                                                                   | Visible and invisible  | Crickets                          |
| 60. Ruby & Rozin, (2019)            | US                                                                              | Tacos with grasshoppers clearly displayed inside; a dosa (an Indian crepe made of rice and lentil flour), rolled up with a (non-visible, but verbally described) filling of potatoes and grasshoppers; six transparent lollipops half containing a mealworm and half containing a grasshopper | Visible and invisible  | Mealworm and grasshopper          |
|                                     | India                                                                           |                                                                                                                                                                                                                                                                                               |                        |                                   |
| 61. Rumpold & Langen, (2019)        | Germany                                                                         | Whole mealworms, locusts                                                                                                                                                                                                                                                                      | Visible                | Mealworms, locusts                |
| 62. Schösler et al., (2012)         | The Netherlands                                                                 | Variety of meat substitutes including pizza containing protein derived from insects, fried locusts with chocolate coating, locust salad, salad with fried mealworms                                                                                                                           | Visible and invisible  | Mealworms, locusts                |

|                              |                              |                                                                                                                                                                                                                                                                                                                                          |                       |                                                                                                                                             |
|------------------------------|------------------------------|------------------------------------------------------------------------------------------------------------------------------------------------------------------------------------------------------------------------------------------------------------------------------------------------------------------------------------------|-----------------------|---------------------------------------------------------------------------------------------------------------------------------------------|
| 63. Schäufele et al., (2019) | Germany                      | Grasshoppers and mealworms (meatballs, whole, crushed)                                                                                                                                                                                                                                                                                   | Visible and invisible | Grasshoppers, mealworms                                                                                                                     |
| 64. Schlup & Brunner, (2018) | Switzerland                  | Mealworms, locusts, caterpillars                                                                                                                                                                                                                                                                                                         | Visible and invisible | Mealworms, locusts, caterpillars                                                                                                            |
| 65. Séré et al., (2018)      | Burkina Faso (Sudanian zone) | Edible insects (Fried, roasted, ingredients)                                                                                                                                                                                                                                                                                             | Visible and invisible | Winged termites, caterpillars, grasshoppers, field cricket, beetles, palm weevil, Oryctes sp                                                |
| 66. (Simion et al., 2019)    | Romania                      | Variety of insects including locusts, ants, and crickets.                                                                                                                                                                                                                                                                                | NS                    | Variety but the most preferred are locusts and ants                                                                                         |
| 67. Sogari et al., (2017)    | Italy                        | Cookie made with cricket flour                                                                                                                                                                                                                                                                                                           | Invisible             | Crickets                                                                                                                                    |
| 68. Sogari et al., (2018)    | Italy                        | Cricket-based jelly.                                                                                                                                                                                                                                                                                                                     | Visible and invisible | Crickets                                                                                                                                    |
| 69. Sogari et al., (2019)    | Italy                        | Whole cricket in a jelly sweet and cricket flour in jelly sweet                                                                                                                                                                                                                                                                          | Visible and invisible | Crickets                                                                                                                                    |
| 70. Sogari, (2015)           | Italy                        | Crickets, honeycomb moths, wax moth larvae, and grasshoppers                                                                                                                                                                                                                                                                             | Visible.              | Crickets, honeycomb moths, wax moth larvae, and grasshoppers                                                                                |
| 71. Sogari, et al., (2019)   | Australia (Sydney)           | Edible insects, cricket flour or edible insects-filled chocolate bars                                                                                                                                                                                                                                                                    | Visible and invisible | Cricket                                                                                                                                     |
| 72. Szendrő et al., (2020)   | Hungary                      | Fried locusts and crickets, cakes contain insect flour                                                                                                                                                                                                                                                                                   | Visible and invisible | Locusts, crickets                                                                                                                           |
| 73. Tan et al., (2015)       | The Netherlands and Thailand | Ant larvae, big-butt ants, grasshoppers, giant water bugs, mopane worms, witchetty grubs, mealworms, bamboo worms, fried grasshoppers with chili and salt, mealworm muffins with chocolate pieces, cricket fritters with roasted peanuts, giant water bug chili paste, chocolate coated grasshoppers, Butter cookies with ground beetles | Visible and invisible | Ant larvae, big-butt ants, grasshoppers, giant water bugs, mopane worms, witchetty grubs, mealworms, bamboo worms, crickets, ground beetles |
| 74. Tan et al., (2016)       | The Netherlands              | Burger labelled as mealworms (75% beef 25% mealworms)                                                                                                                                                                                                                                                                                    | Invisible             | Mealworms                                                                                                                                   |



|                                  |                   |                                                                                                                                                                                                                                                                                                                                           |                       |                                                                                                                |
|----------------------------------|-------------------|-------------------------------------------------------------------------------------------------------------------------------------------------------------------------------------------------------------------------------------------------------------------------------------------------------------------------------------------|-----------------------|----------------------------------------------------------------------------------------------------------------|
| 75. Tan, Tibboel, et al., (2017) | The Netherlands   | Burger claimed to contain ground mealworms                                                                                                                                                                                                                                                                                                | Invisible             | Mealworms                                                                                                      |
| 76. Tan, Verbaan, et al., (2017) | The Netherlands   | Mealworm meatballs, mealworm drink                                                                                                                                                                                                                                                                                                        | Invisible             | Mealworms                                                                                                      |
| 77. Tuccillo et al., (2020)      | Italy             | Variety of insects and insects-based products such as crickets, grasshoppers, and three insects at the larval stage (bee, mealworm and silkworm larvae), cricket flour pasta, giant water bug chili paste, chocolate-covered grasshoppers, muffins with mealworms, fried rice with silkworms, focaccia bread with bits of dried crickets. | Visible and invisible | Cricket, giant water bugs, grasshoppers, three insects at the larval stage (bee, mealworm and silkworm larvae) |
| 78. Van Thielen et al., (2019)   | Belgium           | Variety of products including energy shakes, energy bars, burgers, soup, sandwich spreads, snack                                                                                                                                                                                                                                          | Invisible             | Mealworms                                                                                                      |
| 79. Vanhonacker et al., (2013)   | Belgium           | Proteins from insects                                                                                                                                                                                                                                                                                                                     | NS                    | NS                                                                                                             |
| 80. Verbeke, (2015)              | Belgium           | Insects as a meat substitute                                                                                                                                                                                                                                                                                                              | NS                    | NS                                                                                                             |
| 81. Verneau et al., (2016)       | Denmark and Italy | Chocolate bar enriched with proteins from crickets                                                                                                                                                                                                                                                                                        | Invisible             | Crickets                                                                                                       |
| 82. Verneau et al., (2020)       | Italy and Denmark | Insect based food                                                                                                                                                                                                                                                                                                                         | NS                    | NS                                                                                                             |
| 83. Videbæk & Grunert, (2020)    | Denmark           | Variety of products e.g., baked, baguette baked with cricket flour, Purée of mushy peas and cricket flour, seasoned with garlic and lemon.                                                                                                                                                                                                | Visible and invisible | Crickets and mealworms                                                                                         |
| 84. Wilkinson et al., (2018)     | Australia         | Flavored insects, chocolate-coated insects, biscuits made with insect flour, and a meal containing insects included as options, crickets, ants, witchetty grubs, mealworms, grasshoppers, scorpions, spiders, cockroaches.                                                                                                                | Visible and invisible | Crickets, ants, witchetty grubs, mealworms, grasshoppers, scorpions, spiders, cockroaches                      |

|                          |     |                                                                                                                                                                                                                                                                                       |                       |    |
|--------------------------|-----|---------------------------------------------------------------------------------------------------------------------------------------------------------------------------------------------------------------------------------------------------------------------------------------|-----------------------|----|
| 85. Woolf et al., (2019) | USA | Fried/grilled/toasted whole insects, chocolate coated insects, ground insects in sauces, chutneys, ground insects in burgers/nuggets/meatballs, bakery products, chips containing insect flour, rice/pasta enriched with insect flour, protein bars containing insect protein isolate | Visible and invisible | NS |
|--------------------------|-----|---------------------------------------------------------------------------------------------------------------------------------------------------------------------------------------------------------------------------------------------------------------------------------------|-----------------------|----|

---

NS: not specified.
